# Supplementary material for: The impact of obesity on hospitalized patients with ulcerative colitis
Source: PubMed Central journal article supplement — Ann Gastroenterol. 2021 Jan 27;34(2):196–201. doi: 10.20524/aog.2021.0592 (PMC7903582; doi:10.20524/aog.2021.0592), 2021-01-27
Supplement: AnnGastroenterol-34-196_Suppl1.pdf [file AnnGastroenterol-34-196_Suppl1.pdf]

## Supplementary material

**Supplementary Table 1** ICD-10 codes used in the study

| ICD-10 codes                                                                                                          | Interpretation           |
|-----------------------------------------------------------------------------------------------------------------------|--------------------------|
| K51*                                                                                                                  | Ulcerative colitis       |
| Z681                                                                                                                  | BMI of 19.9 or less      |
| R636                                                                                                                  | Diagnosis of underweight |
| Z68230, Z6831, Z6832, Z6833, Z6834,<br>Z6835, Z6836, Z6837, Z6838, Z6839, Z6840,<br>Z6841, Z6842, Z6843, Z6844, Z6845 | BMI 30 to 70 or greater  |
| E660, E661, E662, E668, E669                                                                                          | Diagnosis of obesity     |

\*All codes that started with K51

*BMI, body mass index; ICD, International Statistical Classification of Diseases and Related Health Problems*

**Supplementary Table 2** Comorbidities compared between the 2 groups

| Comorbidities                             | Non-obese       | Obese       | P-value |
|-------------------------------------------|-----------------|-------------|---------|
| Acute myocardial infarction (%)           | 1730 (3.1)      | 265 (4.4)   | 0.021   |
| Congestive heart failure (%)              | 2115 (3.8)      | 435 (7.2)   | <0.001  |
| Peripheral vascular disease (%)           | 2235 (4.1)      | 290 (4.8)   | 0.220   |
| Cerebrovascular disease (%)               | 1105 (2.0)      | 135 (2.2)   | 0.583   |
| Dementia (%)                              | 1300 (2.4)      | 50 (0.8)    | 0.001   |
| Chronic obstructive pulmonary disease (%) | 7340 (13.3)     | 1290 (21.4) | <0.001  |
| Rheumatoid disease (%)                    | 1735 (3.2)      | 220 (3.7)   | 0.345   |
| Peptic ulcer disease (%)                  | 710 (1.3)       | 80 (1.3)    | 0.908   |
| Mild liver disease (%)                    | 2260 (4.1)      | 365 (6.1)   | 0.002   |
| Diabetes without complications (%)        | 6255 (11.4)     | 1420 (23.6) | <0.001  |
| Diabetes with complications (%)           | 1090 (2.0)      | 320 (5.3)   | <0.001  |
| Hemiplegia or paraplegia (%)              | 220 (0.4)       | 30 (0.5)    | 0.612   |
| Renal disease (%)                         | 2790 (5.1)      | 485 (8.1)   | <0.001  |
| Cancer (any malignancy) (%)               | 1845 (3.4)      | 200 (3.3)   | 0.956   |
| Moderate or severe liver disease (%)      | 405 (0.7)       | 40 (0.7)    | 0.781   |
| Metastatic solid tumor (%)                | 365 (0.7)       | 50 (0.8)    | 0.506   |
| AIDS/HIV (%)                              | 95 (0.2)        | 0.0 (0.0)   | 0.149   |
| Weighted Charlson score (mean (SD))       | 0.77 (1.37)     | 1.17 (1.59) | <0.001  |
| Pregnant (%)                              | 1330.0<br>(2.4) | 110 (1.8)   | 0.176   |

**Supplementary Table 3** Balance summary of propensity scores estimated by regression model across all imputations

| Variable                                                   | Type     | Min.Diff.Un | Mean.Diff.Un | Max.Diff.Un |
|------------------------------------------------------------|----------|-------------|--------------|-------------|
| prop.score                                                 | Distance | -0.399      | -0.397       | -0.396      |
| AGE                                                        | Contin.  | -0.164      | -0.164       | -0.164      |
| ELECTIVE                                                   | Binary   | -0.083      | -0.082       | -0.082      |
| FEMALE                                                     | Binary   | -0.079      | -0.079       | -0.078      |
| Expected primary payer                                     |          |             |              |             |
| Medicare                                                   | Binary   | -0.042      | -0.041       | -0.041      |
| Medicaid                                                   | Binary   | 0.008       | 0.008        | 0.008       |
| Private insurance                                          | Binary   | 0.021       | 0.021        | 0.021       |
| Self-pay                                                   | Binary   | 0.005       | 0.005        | 0.006       |
| No charge                                                  | Binary   | 0.004       | 0.004        | 0.004       |
| Others                                                     | Binary   | 0.002       | 0.002        | 0.003       |
| Patient location: NCHS Urban-Rural Code                    |          |             |              |             |
| “Central” counties of metro areas of ≥1 million population | Binary   | 0.015       | 0.015        | 0.016       |
| “Fringe” counties of metro areas of ≥1 million population  | Binary   | 0.008       | 0.008        | 0.008       |
| Counties in metro areas of 250,000-999,999 population      | Binary   | -0.006      | -0.006       | -0.005      |
| Counties in metro areas of 50,000-249,999 population       | Binary   | -0.004      | -0.004       | -0.004      |
| Metropolitan counties                                      | Binary   | -0.011      | -0.01        | -0.01       |
| Not metropolitan or micropolitan counties                  | Binary   | -0.003      | -0.003       | -0.002      |
| RACE                                                       |          |             |              |             |
| White                                                      | Binary   | -0.011      | -0.011       | -0.009      |
| Black                                                      | Binary   | -0.015      | -0.013       | -0.011      |
| Hispanic                                                   | Binary   | 0.002       | 0.003        | 0.004       |
| Asian or Pacific Islander                                  | Binary   | 0.012       | 0.013        | 0.013       |
| Native American                                            | Binary   | -0.002      | -0.001       | 0           |
| Other                                                      | Binary   | 0.008       | 0.009        | 0.01        |
| Indicator of a transfer into the hospital                  |          |             |              |             |
| Not transferred in                                         | Binary   | -0.006      | -0.005       | -0.005      |
| Transferred in from a different acute care hospital        | Binary   | 0.001       | 0.001        | 0.002       |
| Transferred in from another type of health facility        | Binary   | 0.004       | 0.004        | 0.004       |
| Median household income for patient’s ZIP Code             |          |             |              |             |
| 0-25 <sup>th</sup> percentile                              | Binary   | -0.016      | -0.015       | -0.014      |
| 26 <sup>th</sup> to 50 <sup>th</sup> percentile            | Binary   | -0.021      | -0.02        | -0.02       |
| 51 <sup>st</sup> to 75 <sup>th</sup> percentile            | Binary   | -0.007      | -0.005       | -0.003      |
| 76 <sup>th</sup> to 100 <sup>th</sup> percentile           | Binary   | 0.038       | 0.041        | 0.042       |
| Weighted Charlson score                                    | Contin.  | -0.266      | -0.266       | -0.266      |

**Supplementary Table 4** Balance summary of propensity scores estimated by generalized boosting modeling

| Variable                                                   | tx.mn  | tx.sd  | ct.mn  | ct.sd  | std.eff. sz | stat  | P-value |
|------------------------------------------------------------|--------|--------|--------|--------|-------------|-------|---------|
| AGE                                                        | 51.451 | 18.544 | 51.276 | 19.535 | 0.009       | 0.236 | 0.814   |
| ELECTIVE:0                                                 | 0.785  | 0.411  | 0.796  | 0.403  | -0.026      | 1.056 | 0.347   |
| ELECTIVE:1                                                 | 0.213  | 0.41   | 0.201  | 0.401  | 0.029       | NA    | NA      |
| ELECTIVE:<NA>                                              | 0.001  | 0.038  | 0.003  | 0.054  | -0.039      | NA    | NA      |
| FEMALE:0                                                   | 0.431  | 0.495  | 0.453  | 0.498  | -0.044      | 0.966 | 0.379   |
| FEMALE:1                                                   | 0.568  | 0.495  | 0.546  | 0.498  | 0.043       | NA    | NA      |
| FEMALE:<NA>                                                | 0.002  | 0.039  | 0.001  | 0.033  | 0.011       | NA    | NA      |
| Expected primary payer (%)                                 |        |        |        |        |             |       |         |
| Medicare                                                   | 0.329  | 0.47   | 0.327  | 0.469  | 0.006       | 0.775 | 0.55    |
| Medicaid                                                   | 0.143  | 0.35   | 0.142  | 0.349  | 0.003       | NA    | NA      |
| Private insurance                                          | 0.465  | 0.499  | 0.455  | 0.498  | 0.021       | NA    | NA      |
| Self-pay                                                   | 0.035  | 0.185  | 0.041  | 0.199  | -0.032      | NA    | NA      |
| No charge                                                  | 0.002  | 0.047  | 0.005  | 0.07   | -0.058      | NA    | NA      |
| Others                                                     | 0.025  | 0.157  | 0.03   | 0.17   | -0.029      | NA    | NA      |
| PAY1:<NA>                                                  | 0      | 0      | 0.001  | 0.034  | NA          | NA    | NA      |
| Patient location: NCHS Urban–Rural Code (%)                |        |        |        |        |             |       |         |
| “Central” counties of metro areas of ≥1 million population | 0.292  | 0.455  | 0.295  | 0.456  | -0.007      | 1.167 | 0.322   |
| “Fringe” counties of metro areas of ≥1 million population  | 0.277  | 0.448  | 0.281  | 0.449  | -0.007      | NA    | NA      |
| Counties in metro areas of 250,000-999,999 population      | 0.203  | 0.402  | 0.199  | 0.399  | 0.011       | NA    | NA      |
| Counties in metro areas of 50,000-249,999 population       | 0.094  | 0.292  | 0.09   | 0.286  | 0.014       | NA    | NA      |
| Micropolitan counties                                      | 0.082  | 0.274  | 0.077  | 0.267  | 0.018       | NA    | NA      |
| Not metropolitan or micropolitan counties                  | 0.052  | 0.222  | 0.055  | 0.228  | -0.015      | NA    | NA      |
| PL_NCHS:<NA>                                               | 0      | 0      | 0.003  | 0.058  | NA          | NA    | NA      |
| RACE (%)                                                   |        |        |        |        |             |       |         |
| White                                                      | 0.744  | 0.437  | 0.728  | 0.445  | 0.036       | 1.423 | 0.205   |
| Black                                                      | 0.096  | 0.295  | 0.094  | 0.292  | 0.009       | NA    | NA      |
| Hispanic                                                   | 0.089  | 0.285  | 0.085  | 0.279  | 0.014       | NA    | NA      |
| Asian or Pacific Islander                                  | 0.006  | 0.077  | 0.016  | 0.124  | -0.126      | NA    | NA      |
| Native American                                            | 0.004  | 0.067  | 0.005  | 0.068  | -0.003      | NA    | NA      |
| Other                                                      | 0.024  | 0.152  | 0.03   | 0.17   | -0.042      | NA    | NA      |
| RACE:<NA>                                                  | 0.037  | 0.188  | 0.043  | 0.203  | -0.032      | NA    | NA      |
| Indicator of a transfer into the hospital (%)              |        |        |        |        |             |       |         |
| Not transferred in                                         | 0.951  | 0.215  | 0.944  | 0.23   | 0.034       | 0.354 | 0.781   |
| Transferred in from a different acute care hospital        | 0.033  | 0.18   | 0.039  | 0.193  | -0.031      | NA    | NA      |
| Transferred in from another type of health facility        | 0.012  | 0.109  | 0.013  | 0.112  | -0.007      | NA    | NA      |
| Median household income for patient’s ZIP Code             |        |        |        |        |             |       |         |
| 0-25 <sup>th</sup> percentile                              | 0.003  | 0.058  | 0.004  | 0.066  | -0.017      | NA    | NA      |
| 26 <sup>th</sup> to 50 <sup>th</sup> percentile (median)   | 0.227  | 0.419  | 0.223  | 0.416  | 0.011       | 1.59  | 0.174   |
| 51 <sup>st</sup> to 75 <sup>th</sup> percentile            | 0.257  | 0.437  | 0.241  | 0.428  | 0.036       | NA    | NA      |
| 76 <sup>th</sup> to 100 <sup>th</sup> percentile           | 0.258  | 0.438  | 0.258  | 0.438  | 0           | NA    | NA      |
| Median household income for patient’s ZIP Code             | 0.25   | 0.433  | 0.26   | 0.439  | -0.025      | NA    | NA      |
| ZIPINC_QRTL:<NA>                                           | 0.008  | 0.091  | 0.017  | 0.131  | -0.101      | NA    | NA      |
| Weighted Charlson score                                    | 0.825  | 1.399  | 0.808  | 1.395  | 0.012       | 0.385 | 0.701   |

NA, not available

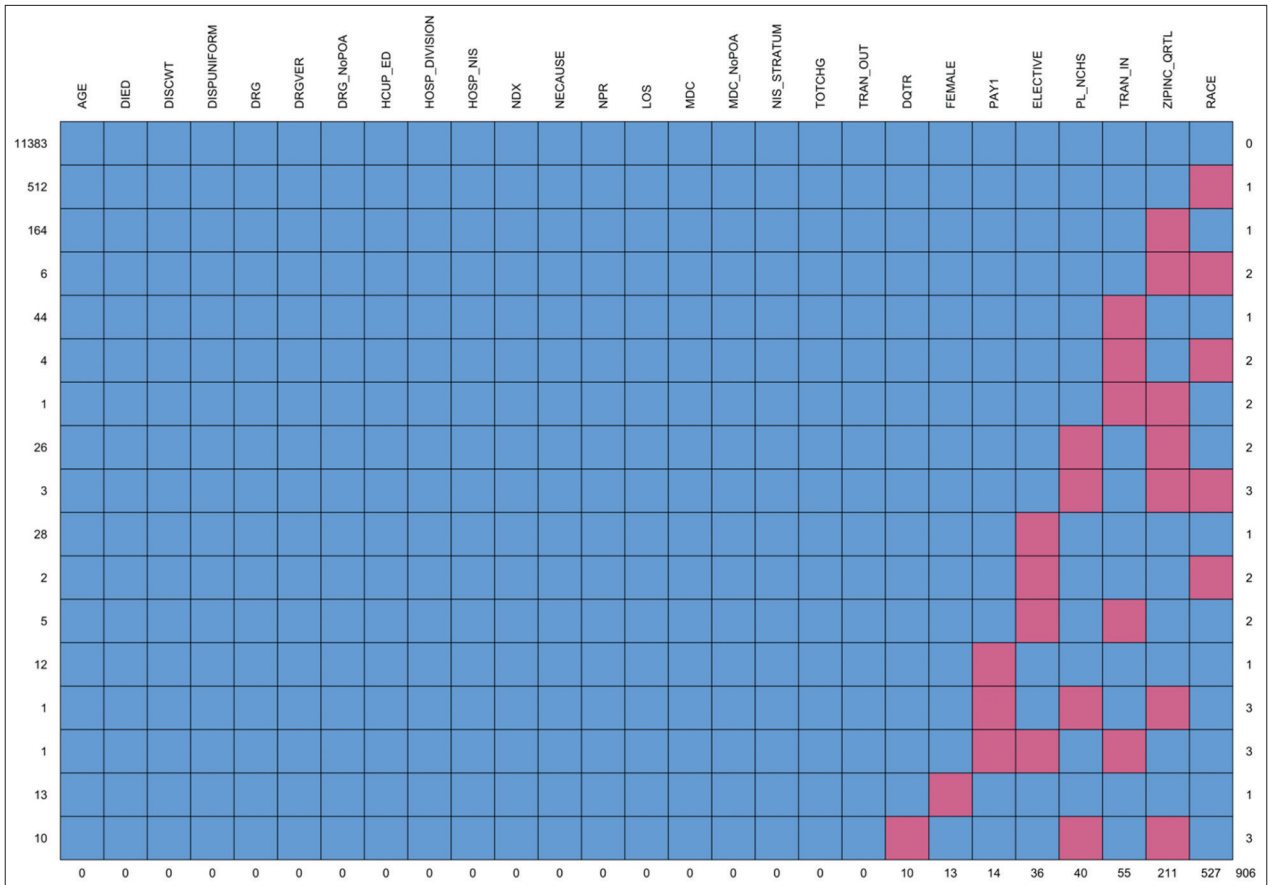

**Supplementary Figure 1** Missing data pattern, blue represents no missing data and pink represents missing data

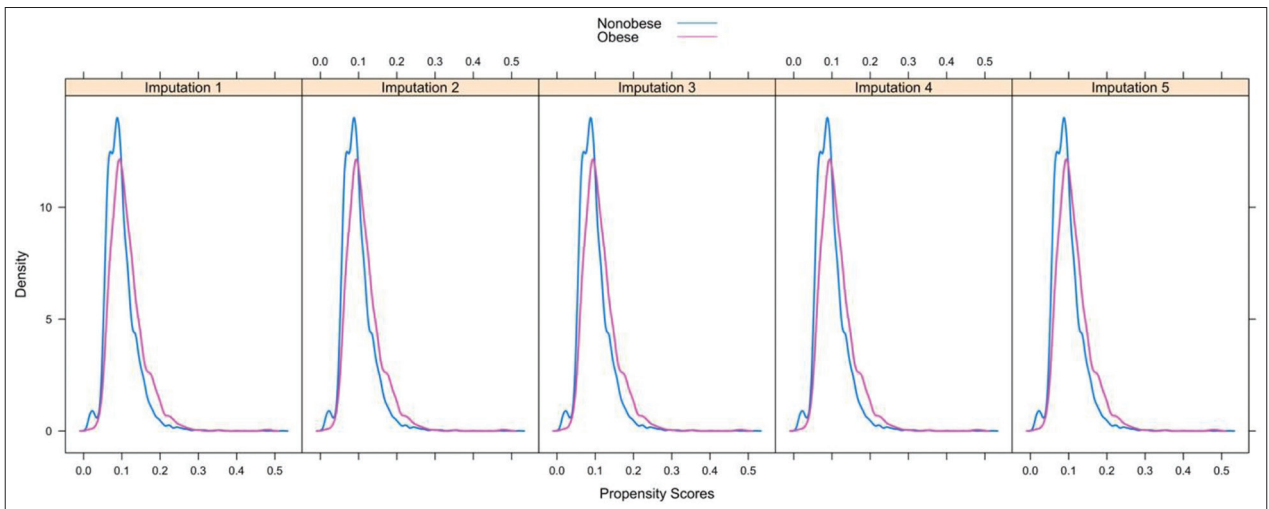

**Supplementary Figure 2** Kernel density plots to evaluate common support in the propensity scores estimated by regression model in all imputed datasets. Imputation 1 to Imputation 5 represent all imputed datasets estimated by multiple imputations. The blue curves represent nonobese subjects and pink curves represent obese subjects in the dataset

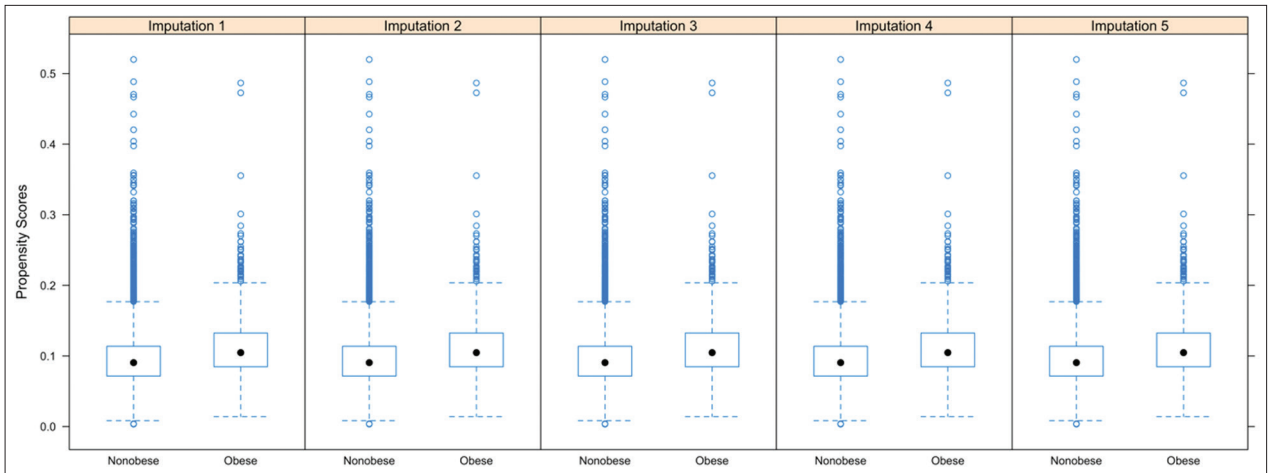

**Supplementary Figure 3** Box-and-whiskers plots to evaluate common support in the propensity scores estimated by regression model in all imputed datasets. Imputation 1 to Imputation 5 represent all imputed datasets estimated by multiple imputations

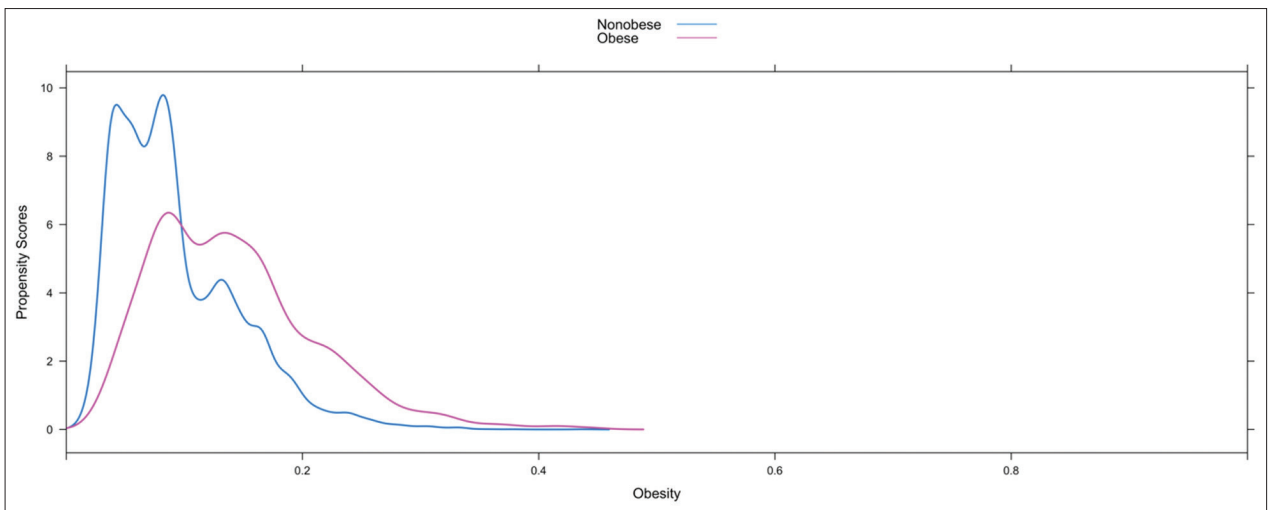

**Supplementary Figure 4** Kernel density plot to evaluate common support in the propensity scores estimated by generalized boosting modeling

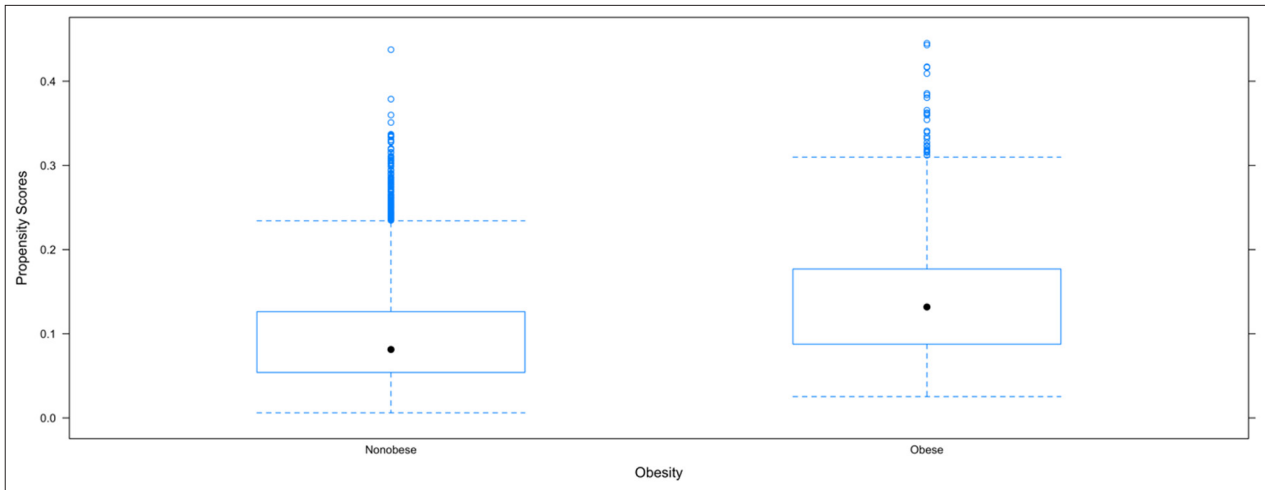

**Supplementary Figure 5** Box-and-whiskers plots to evaluate common support in the propensity scores estimated by generalized boosting modeling

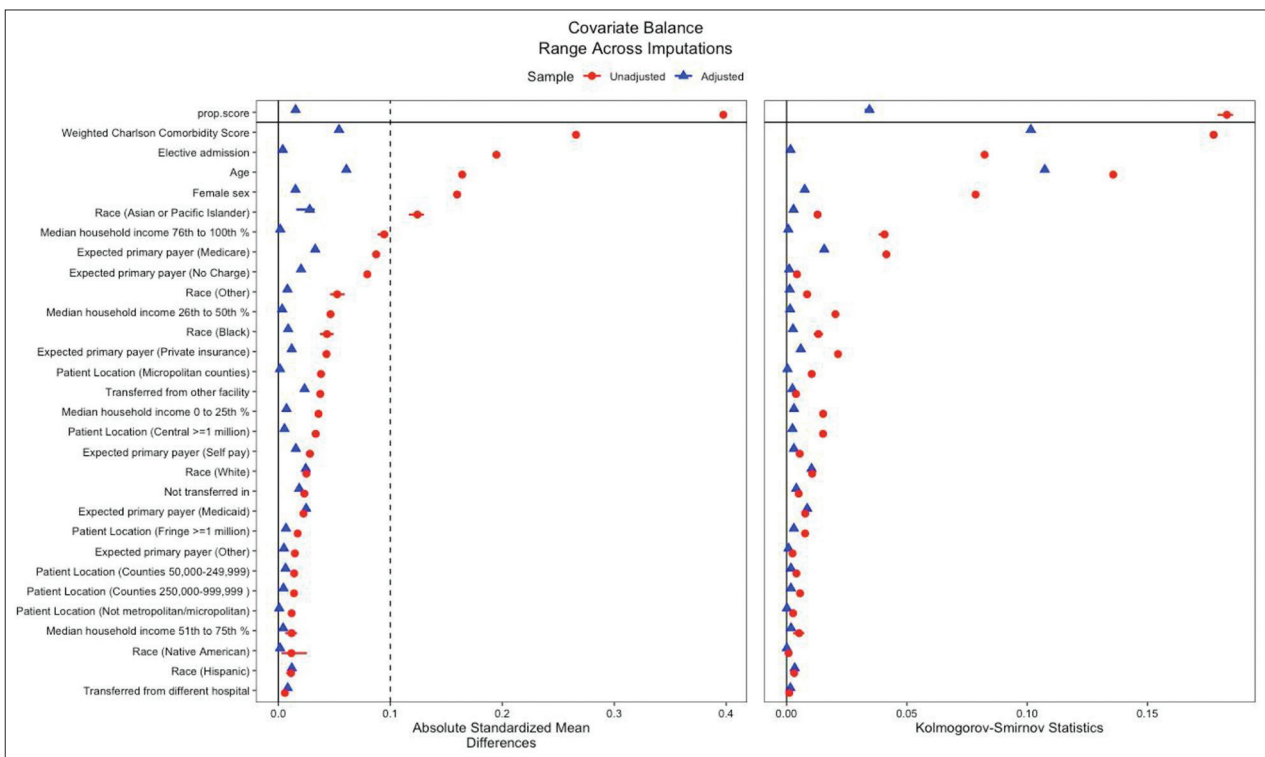

**Supplementary Figure 6** Love plot summarizing covariate balance before and after applying inverse probability of treatment weighting (IPTW).  
 ● Represent covariates before applying IPTW and ▲ represent covariates after applying IPTW

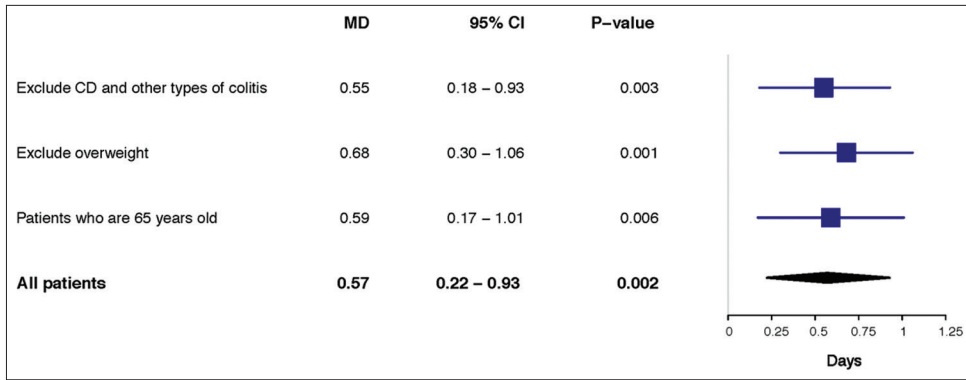

**Supplementary Figure 7** Subgroup analyses of length of hospital stay  
*CI, confidence interval; MD, mean difference; CD, Crohn's disease*

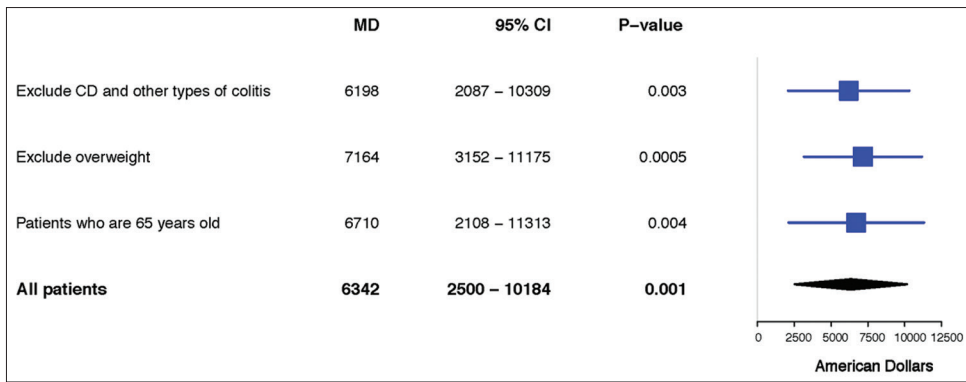

**Supplementary Figure 8** Subgroup analyses of total charges  
*CI, confidence interval; MD, mean difference; CD, Crohn's disease*
